# Supplementary material
Source: publisher figshare collection journal article supplement (https://rs.figshare.com/ndownloader/files/26902431)
Supplement: Supplementary file 1 [file 26902431]

## Sheet: Sheet1
Species	Treatment	chem_rate5	Disp_rate5	Belly	Clade
occidentalis	con	1	1	Blue	VirUndOcc
occidentalis	con	0	0	Blue	VirUndOcc
occidentalis	con	6	6	Blue	VirUndOcc
occidentalis	con	3	6	Blue	VirUndOcc
occidentalis	con	0	1.11111	Blue	VirUndOcc
occidentalis	con	0	0	Blue	VirUndOcc
occidentalis	con	1	1	Blue	VirUndOcc
occidentalis	con	0	0	Blue	VirUndOcc
occidentalis	con	0	0	Blue	VirUndOcc
occidentalis	con	0	0	Blue	VirUndOcc
occidentalis	con	9	4	Blue	VirUndOcc
occidentalis	con	4	0	Blue	VirUndOcc
occidentalis	con	5	1	Blue	VirUndOcc
occidentalis	con	0	2	Blue	VirUndOcc
occidentalis	con	4	3	Blue	VirUndOcc
occidentalis	con	1	1	Blue	VirUndOcc
occidentalis	con	1	3	Blue	VirUndOcc
occidentalis	con	3	0	Blue	VirUndOcc
occidentalis	con	1	2	Blue	VirUndOcc
occidentalis	con	1	1	Blue	VirUndOcc
occidentalis	cue	8	0	Blue	VirUndOcc
occidentalis	cue	1	5	Blue	VirUndOcc
occidentalis	cue	1	0	Blue	VirUndOcc
occidentalis	cue	1	0	Blue	VirUndOcc
occidentalis	cue	0	0	Blue	VirUndOcc
occidentalis	cue	10	2	Blue	VirUndOcc
occidentalis	cue	2.5	0	Blue	VirUndOcc
occidentalis	cue	3	0	Blue	VirUndOcc
occidentalis	cue	0	0	Blue	VirUndOcc
occidentalis	cue	2.5	0	Blue	VirUndOcc
occidentalis	cue	6	5	Blue	VirUndOcc
occidentalis	cue	7	1	Blue	VirUndOcc
occidentalis	cue	0	1	Blue	VirUndOcc
occidentalis	cue	8	2	Blue	VirUndOcc
occidentalis	cue	5	1	Blue	VirUndOcc
occidentalis	cue	0	1	Blue	VirUndOcc
occidentalis	cue	1	3	Blue	VirUndOcc
occidentalis	cue	2	1	Blue	VirUndOcc
occidentalis	cue	1	1	Blue	VirUndOcc
occidentalis	cue	0	1	Blue	VirUndOcc
siniferus	con	0.833333	6.66667	White	MerSinGrac
siniferus	cue	1.66667	1.66667	White	MerSinGrac
siniferus	con	1.66667	3.33333	White	MerSinGrac
siniferus	cue	0	9	White	MerSinGrac
siniferus	cue	0	3	White	MerSinGrac
siniferus	con	0	4	White	MerSinGrac
siniferus	con	0	1.25	White	MerSinGrac
siniferus	cue	1.25	2.5	White	MerSinGrac
siniferus	con	0	0	White	MerSinGrac
siniferus	con	0	5	White	MerSinGrac
siniferus	cue	0	0	White	MerSinGrac
siniferus	con	0	4	White	MerSinGrac
siniferus	con	1	7	White	MerSinGrac
siniferus	cue	0	4	White	MerSinGrac
siniferus	cue	0	8	White	MerSinGrac
siniferus	con	0	3	White	MerSinGrac
siniferus	cue	0	5	White	MerSinGrac
siniferus	cue	0	0	White	MerSinGrac
siniferus	con	0	0	White	MerSinGrac
siniferus	cue	1	0	White	MerSinGrac
siniferus	con	0	4	White	MerSinGrac
siniferus	cue	0	0	White	MerSinGrac
siniferus	cue	0	1	White	MerSinGrac
siniferus	con	0	3	White	MerSinGrac
siniferus	cue	0	0	White	MerSinGrac
siniferus	cue	0	0	White	MerSinGrac
siniferus	con	1.66667	13.3333	White	MerSinGrac
merriami	cue	1	0	Blue	MerSinGrac
merriami	cue	6	0	Blue	MerSinGrac
merriami	con	0	0	Blue	MerSinGrac
merriami	con	0	0	Blue	MerSinGrac
merriami	cue	0	0	Blue	MerSinGrac
merriami	con	0	1	Blue	MerSinGrac
merriami	con	0	1	Blue	MerSinGrac
merriami	cue	1.25	1.25	Blue	MerSinGrac
merriami	con	0	0	Blue	MerSinGrac
merriami	cue	0	0	Blue	MerSinGrac
merriami	con	2	0	Blue	MerSinGrac
merriami	cue	2	0	Blue	MerSinGrac
merriami	con	0	1	Blue	MerSinGrac
merriami	cue	0	0	Blue	MerSinGrac
merriami	cue	3	0	Blue	MerSinGrac
merriami	con	2	4	Blue	MerSinGrac
merriami	con	2	0	Blue	MerSinGrac
merriami	cue	0	0	Blue	MerSinGrac
merriami	cue	2	0	Blue	MerSinGrac
merriami	con	0	0	Blue	MerSinGrac
grammicus	cue	4	5	Blue	GramJarrMeg
grammicus	cue	5	6	Blue	GramJarrMeg
grammicus	cue	2	1	Blue	GramJarrMeg
grammicus	cue	0	0	Blue	GramJarrMeg
grammicus	cue	3	2	Blue	GramJarrMeg
grammicus	cue	5	3	Blue	GramJarrMeg
grammicus	cue	3	2	Blue	GramJarrMeg
grammicus	cue	0	1	Blue	GramJarrMeg
grammicus	cue	4	0	Blue	GramJarrMeg
grammicus	cue	1	2	Blue	GramJarrMeg
grammicus	cue	2	6	Blue	GramJarrMeg
grammicus	cue	3	0	Blue	GramJarrMeg
grammicus	cue	1	0	Blue	GramJarrMeg
grammicus	cue	3	2	Blue	GramJarrMeg
grammicus	cue	1	0	Blue	GramJarrMeg
grammicus	cue	1	1	Blue	GramJarrMeg
grammicus	cue	23.75	1.25	Blue	GramJarrMeg
grammicus	cue	0	0	Blue	GramJarrMeg
grammicus	cue	5	3	Blue	GramJarrMeg
grammicus	cue	4	2	Blue	GramJarrMeg
grammicus	cue	0	0	Blue	GramJarrMeg
grammicus	cue	0	0	Blue	GramJarrMeg
grammicus	cue	0	1	Blue	GramJarrMeg
grammicus	con	0	0	Blue	GramJarrMeg
grammicus	con	1	0	Blue	GramJarrMeg
grammicus	con	2	0	Blue	GramJarrMeg
grammicus	con	1	2	Blue	GramJarrMeg
grammicus	con	2	1	Blue	GramJarrMeg
grammicus	con	4	4	Blue	GramJarrMeg
grammicus	con	1	0	Blue	GramJarrMeg
grammicus	con	2	1	Blue	GramJarrMeg
grammicus	con	3	0	Blue	GramJarrMeg
grammicus	con	3	1	Blue	GramJarrMeg
grammicus	con	10	3	Blue	GramJarrMeg
grammicus	con	1	1	Blue	GramJarrMeg
grammicus	con	0	1	Blue	GramJarrMeg
grammicus	con	1	0	Blue	GramJarrMeg
grammicus	con	2.5	2.5	Blue	GramJarrMeg
grammicus	con	1	4	Blue	GramJarrMeg
grammicus	con	4	2	Blue	GramJarrMeg
grammicus	con	2	2	Blue	GramJarrMeg
grammicus	con	1	2	Blue	GramJarrMeg
grammicus	con	1	1	Blue	GramJarrMeg
grammicus	con	2	3	Blue	GramJarrMeg
jarrovii	cue	0	5	Blue	GramJarrMeg
jarrovii	cue	0	0	Blue	GramJarrMeg
jarrovii	cue	5	5	Blue	GramJarrMeg
jarrovii	cue	0	4	Blue	GramJarrMeg
jarrovii	cue	0	5	Blue	GramJarrMeg
jarrovii	cue	4	8	Blue	GramJarrMeg
jarrovii	cue	3	1	Blue	GramJarrMeg
jarrovii	cue	1	12	Blue	GramJarrMeg
jarrovii	cue	0	0	Blue	GramJarrMeg
jarrovii	cue	0	4	Blue	GramJarrMeg
jarrovii	cue	0	0	Blue	GramJarrMeg
jarrovii	cue	4	20	Blue	GramJarrMeg
jarrovii	cue	1	3	Blue	GramJarrMeg
jarrovii	cue	1.25	7.5	Blue	GramJarrMeg
jarrovii	cue	0	7.5	Blue	GramJarrMeg
jarrovii	cue	0	7	Blue	GramJarrMeg
jarrovii	cue	0	0	Blue	GramJarrMeg
jarrovii	cue	7.5	18.75	Blue	GramJarrMeg
jarrovii	cue	1	1	Blue	GramJarrMeg
jarrovii	cue	5	13	Blue	GramJarrMeg
jarrovii	cue	1	3	Blue	GramJarrMeg
jarrovii	con	2	8	Blue	GramJarrMeg
jarrovii	con	0	0	Blue	GramJarrMeg
jarrovii	con	1	3	Blue	GramJarrMeg
jarrovii	con	0	0	Blue	GramJarrMeg
jarrovii	con	2	9	Blue	GramJarrMeg
jarrovii	con	0	4	Blue	GramJarrMeg
jarrovii	con	1	1	Blue	GramJarrMeg
jarrovii	con	2	9	Blue	GramJarrMeg
jarrovii	con	0	0	Blue	GramJarrMeg
jarrovii	con	0	0	Blue	GramJarrMeg
jarrovii	con	8.75	12.5	Blue	GramJarrMeg
jarrovii	con	3	5	Blue	GramJarrMeg
jarrovii	con	3	3	Blue	GramJarrMeg
jarrovii	con	0	0	Blue	GramJarrMeg
jarrovii	con	2	7	Blue	GramJarrMeg
jarrovii	con	3	7	Blue	GramJarrMeg
jarrovii	con	4	6	Blue	GramJarrMeg
jarrovii	con	3	6	Blue	GramJarrMeg
jarrovii	con	0	1	Blue	GramJarrMeg
jarrovii	con	0	7	Blue	GramJarrMeg
variabilis	con	1	0	Blue	ParCozVar
variabilis	con	1	3	Blue	ParCozVar
variabilis	con	1.25	3.75	Blue	ParCozVar
variabilis	con	7.5	2.5	Blue	ParCozVar
variabilis	con	2	0	Blue	ParCozVar
variabilis	con	0	0	Blue	ParCozVar
variabilis	con	0	2	Blue	ParCozVar
variabilis	con	6	3	Blue	ParCozVar
variabilis	con	0	0	Blue	ParCozVar
variabilis	con	0	0	Blue	ParCozVar
variabilis	cue	0	0	Blue	ParCozVar
variabilis	cue	0	2	Blue	ParCozVar
variabilis	cue	0	4	Blue	ParCozVar
variabilis	cue	2	3	Blue	ParCozVar
variabilis	cue	3	3	Blue	ParCozVar
variabilis	cue	6.25	5	Blue	ParCozVar
variabilis	cue	0	4	Blue	ParCozVar
variabilis	cue	1	0	Blue	ParCozVar
variabilis	cue	8	4	Blue	ParCozVar
cozumelae	cue	4	6	White	ParCozVar
cozumelae	cue	1	5	White	ParCozVar
cozumelae	cue	0	4	White	ParCozVar
cozumelae	cue	4	2	White	ParCozVar
cozumelae	cue	3	5	White	ParCozVar
cozumelae	cue	1	4	White	ParCozVar
cozumelae	cue	0	6	White	ParCozVar
cozumelae	cue	0	7	White	ParCozVar
cozumelae	cue	3	1	White	ParCozVar
cozumelae	cue	7	2	White	ParCozVar
cozumelae	cue	4	2	White	ParCozVar
cozumelae	con	0	0	White	ParCozVar
cozumelae	con	0	0	White	ParCozVar
cozumelae	con	0	0	White	ParCozVar
cozumelae	con	0	0	White	ParCozVar
cozumelae	con	0	0	White	ParCozVar
cozumelae	con	0	0	White	ParCozVar
cozumelae	con	0	0	White	ParCozVar
cozumelae	con	0	1	White	ParCozVar
cozumelae	con	8	0	White	ParCozVar
cozumelae	con	2	1	White	ParCozVar
cozumelae	con	0	0	White	ParCozVar
cozumelae	con	0	0	White	ParCozVar
graciosus	con	6	2	Blue	MerSinGrac
graciosus	con	1	3	Blue	MerSinGrac
graciosus	con	4	3	Blue	MerSinGrac
graciosus	con	12	3	Blue	MerSinGrac
graciosus	con	2	1	Blue	MerSinGrac
graciosus	con	0	3	Blue	MerSinGrac
graciosus	con	1	2	Blue	MerSinGrac
graciosus	con	3	3	Blue	MerSinGrac
graciosus	con	3	2	Blue	MerSinGrac
graciosus	con	3	10	Blue	MerSinGrac
graciosus	con	1	5	Blue	MerSinGrac
graciosus	con	2	6	Blue	MerSinGrac
graciosus	con	3	0	Blue	MerSinGrac
graciosus	con	0	2	Blue	MerSinGrac
graciosus	con	0	3	Blue	MerSinGrac
graciosus	con	0	1	Blue	MerSinGrac
graciosus	con	3	10	Blue	MerSinGrac
graciosus	con	0	2	Blue	MerSinGrac
graciosus	con	0	1	Blue	MerSinGrac
graciosus	con	1	0	Blue	MerSinGrac
graciosus	con	1	4	Blue	MerSinGrac
graciosus	cue	1	4	Blue	MerSinGrac
graciosus	cue	1	2	Blue	MerSinGrac
graciosus	cue	0	4	Blue	MerSinGrac
graciosus	cue	2	4	Blue	MerSinGrac
graciosus	cue	3	5	Blue	MerSinGrac
graciosus	cue	0	3.33333	Blue	MerSinGrac
graciosus	cue	1	3	Blue	MerSinGrac
graciosus	cue	0	0	Blue	MerSinGrac
graciosus	cue	3	4	Blue	MerSinGrac
graciosus	cue	0	1.11111	Blue	MerSinGrac
graciosus	cue	2	2	Blue	MerSinGrac
graciosus	cue	0	1	Blue	MerSinGrac
graciosus	cue	0	1	Blue	MerSinGrac
graciosus	cue	0	3	Blue	MerSinGrac
graciosus	cue	1	2	Blue	MerSinGrac
graciosus	cue	2	5	Blue	MerSinGrac
graciosus	cue	0	0	Blue	MerSinGrac
graciosus	cue	3	0	Blue	MerSinGrac
graciosus	cue	0	2	Blue	MerSinGrac
graciosus	cue	1	2	Blue	MerSinGrac
graciosus	cue	0	2	Blue	MerSinGrac
virgatus	cue	12.7273	7.27273	White	VirUndOcc
virgatus	cue	3.90879	1.9544	White	VirUndOcc
virgatus	cue	0.909091	0.909091	White	VirUndOcc
virgatus	cue	14.5455	0	White	VirUndOcc
virgatus	cue	1.76471	2.64706	White	VirUndOcc
virgatus	cue	6.36364	2.72727	White	VirUndOcc
virgatus	cue	2.72727	0.909091	White	VirUndOcc
virgatus	cue	4.54545	2.72727	White	VirUndOcc
virgatus	cue	12	6	White	VirUndOcc
virgatus	cue	2.61628	0	White	VirUndOcc
virgatus	cue	1.81818	0.909091	White	VirUndOcc
virgatus	cue	0.909091	1.81818	White	VirUndOcc
virgatus	cue	14.2857	0.840336	White	VirUndOcc
virgatus	cue	4.54545	0	White	VirUndOcc
virgatus	cue	0.909091	2.72727	White	VirUndOcc
virgatus	cue	6.36364	0.909091	White	VirUndOcc
virgatus	cue	3.63636	1.81818	White	VirUndOcc
virgatus	cue	8.18182	3.63636	White	VirUndOcc
virgatus	cue	1.81818	1.81818	White	VirUndOcc
virgatus	con	0	1.80723	White	VirUndOcc
virgatus	con	0.909091	5.45455	White	VirUndOcc
virgatus	con	0	0	White	VirUndOcc
virgatus	con	0	0.909091	White	VirUndOcc
virgatus	con	2.76923	1.84615	White	VirUndOcc
virgatus	con	0.923077	0	White	VirUndOcc
virgatus	con	0	1.81818	White	VirUndOcc
virgatus	con	3.94737	0.986842	White	VirUndOcc
virgatus	con	1.81269	3.62538	White	VirUndOcc
virgatus	con	0	0	White	VirUndOcc
virgatus	con	0	0.914634	White	VirUndOcc
virgatus	con	0	0.895522	White	VirUndOcc
virgatus	con	0	0	White	VirUndOcc
virgatus	con	0	0	White	VirUndOcc
virgatus	con	1.82371	2.73556	White	VirUndOcc
virgatus	con	1	1	White	VirUndOcc
virgatus	con	0.911854	0	White	VirUndOcc
virgatus	con	0	0.909091	White	VirUndOcc
virgatus	con	0	0	White	VirUndOcc
parvus	cue	0	0	Blue	ParCozVar
parvus	cue	0	0	Blue	ParCozVar
parvus	cue	4	0	Blue	ParCozVar
parvus	cue	1	0	Blue	ParCozVar
parvus	cue	0	3	Blue	ParCozVar
parvus	cue	1	2	Blue	ParCozVar
parvus	cue	4	4	Blue	ParCozVar
parvus	cue	0	0	Blue	ParCozVar
parvus	cue	1	2	Blue	ParCozVar
parvus	cue	0	3	Blue	ParCozVar
parvus	cue	3	0	Blue	ParCozVar
parvus	cue	1	3	Blue	ParCozVar
parvus	cue	2	0	Blue	ParCozVar
parvus	con	10	3	Blue	ParCozVar
parvus	con	1	0	Blue	ParCozVar
parvus	con	3	0	Blue	ParCozVar
parvus	con	1	0	Blue	ParCozVar
parvus	con	0	0	Blue	ParCozVar
parvus	con	0	1	Blue	ParCozVar
parvus	con	3	1	Blue	ParCozVar
parvus	con	0	0	Blue	ParCozVar
parvus	con	0	0	Blue	ParCozVar
parvus	con	2	0	Blue	ParCozVar
parvus	con	5	0	Blue	ParCozVar
parvus	con	2	0	Blue	ParCozVar
parvus	con	1	4	Blue	ParCozVar
megalepidurus	cue	0	4	White	GramJarrMeg
megalepidurus	con	1	6	White	GramJarrMeg
megalepidurus	con	0	3	White	GramJarrMeg
megalepidurus	cue	4	0	White	GramJarrMeg
megalepidurus	con	3	3	White	GramJarrMeg
megalepidurus	cue	2.5	3.33333	White	GramJarrMeg
megalepidurus	con	0	1	White	GramJarrMeg
megalepidurus	cue	0	5.83333	White	GramJarrMeg
megalepidurus	cue	1	4	White	GramJarrMeg
megalepidurus	con	0	0	White	GramJarrMeg
megalepidurus	cue	1	2	White	GramJarrMeg
megalepidurus	con	0	4	White	GramJarrMeg
megalepidurus	cue	4	9	White	GramJarrMeg
megalepidurus	con	1	4	White	GramJarrMeg
megalepidurus	con	1	4	White	GramJarrMeg
megalepidurus	cue	0	1	White	GramJarrMeg
megalepidurus	con	1	4	White	GramJarrMeg
megalepidurus	cue	3	1	White	GramJarrMeg
megalepidurus	con	1	3	White	GramJarrMeg
megalepidurus	cue	1	0	White	GramJarrMeg
megalepidurus	con	0	5	White	GramJarrMeg
megalepidurus	cue	9	5	White	GramJarrMeg
megalepidurus	con	0	5	White	GramJarrMeg
megalepidurus	cue	6	4	White	GramJarrMeg
megalepidurus	con	5	4.16667	White	GramJarrMeg
megalepidurus	cue	3	1	White	GramJarrMeg
megalepidurus	con	0.833333	0.833333	White	GramJarrMeg
megalepidurus	cue	2	3	White	GramJarrMeg
megalepidurus	con	4.16667	5	White	GramJarrMeg
megalepidurus	cue	2.14286	2.14286	White	GramJarrMeg
megalepidurus	con	2	3	White	GramJarrMeg
megalepidurus	cue	6	3	White	GramJarrMeg
megalepidurus	con	0.833333	3.33333	White	GramJarrMeg
megalepidurus	cue	0	0.833333	White	GramJarrMeg
megalepidurus	con	0	1.42857	White	GramJarrMeg
megalepidurus	cue	1.66667	0.833333	White	GramJarrMeg
megalepidurus	con	0.833333	0.833333	White	GramJarrMeg
megalepidurus	cue	0.625	6.25	White	GramJarrMeg
megalepidurus	con	1.42857	2.85714	White	GramJarrMeg
megalepidurus	cue	2.5	1.66667	White	GramJarrMeg
megalepidurus	con	0.833333	3.33333	White	GramJarrMeg
megalepidurus	con	1.66667	2.5	White	GramJarrMeg
cozumelae	Baseline	0.983333	0	White	ParCozVar
cozumelae	Baseline	0	0.325	White	ParCozVar
cozumelae	Baseline	0	1.15833	White	ParCozVar
cozumelae	Baseline	0.308333	2.475	White	ParCozVar
cozumelae	Baseline	0	0	White	ParCozVar
cozumelae	Baseline	0.591667	1.49167	White	ParCozVar
cozumelae	Baseline	0	2.125	White	ParCozVar
cozumelae	Baseline	0	1.625	White	ParCozVar
cozumelae	Baseline	0	0	White	ParCozVar
cozumelae	Baseline	0	0.308333	White	ParCozVar
cozumelae	Baseline	0	0	White	ParCozVar
cozumelae	Baseline	0	0	White	ParCozVar
cozumelae	Baseline	0.583333	2.925	White	ParCozVar
cozumelae	Baseline	1.75	0.25	White	ParCozVar
cozumelae	Baseline	0	1.39167	White	ParCozVar
cozumelae	Baseline	0	2.00833	White	ParCozVar
cozumelae	Baseline	0	1.54167	White	ParCozVar
cozumelae	Baseline	0	0.933333	White	ParCozVar
cozumelae	Baseline	0	5.60833	White	ParCozVar
cozumelae	Baseline	0.725	0.241667	White	ParCozVar
cozumelae	Baseline	0	0	White	ParCozVar
cozumelae	Baseline	0	3.55	White	ParCozVar
cozumelae	STI	0	1.29167	White	ParCozVar
cozumelae	STI	0	2.125	White	ParCozVar
cozumelae	STI	0	0.8	White	ParCozVar
cozumelae	STI	0.333333	2.31667	White	ParCozVar
cozumelae	STI	0	3.475	White	ParCozVar
cozumelae	STI	0	1.79167	White	ParCozVar
cozumelae	STI	0	0	White	ParCozVar
cozumelae	STI	0	1.35	White	ParCozVar
cozumelae	STI	0	4.95	White	ParCozVar
cozumelae	STI	0	0	White	ParCozVar
cozumelae	STI	0.416667	1.25833	White	ParCozVar
cozumelae	STI	0	3.975	White	ParCozVar
cozumelae	STI	0	5.03333	White	ParCozVar
cozumelae	STI	0	1.24167	White	ParCozVar
merriami	Baseline	2.28333	1.14167	Blue	MerSinGrac
merriami	Baseline	0	0.308333	Blue	MerSinGrac
merriami	Baseline	1.46667	1.46667	Blue	MerSinGrac
merriami	Baseline	0	2.49167	Blue	MerSinGrac
merriami	Baseline	0	0	Blue	MerSinGrac
merriami	Baseline	0.283333	0.141667	Blue	MerSinGrac
merriami	Baseline	0	0.491667	Blue	MerSinGrac
merriami	Baseline	0	0	Blue	MerSinGrac
merriami	Baseline	0	0.483333	Blue	MerSinGrac
merriami	Baseline	0	0	Blue	MerSinGrac
merriami	Baseline	2.15	0	Blue	MerSinGrac
merriami	Baseline	0	0	Blue	MerSinGrac
merriami	Baseline	1.50833	0.65	Blue	MerSinGrac
merriami	Baseline	11.8167	1.36667	Blue	MerSinGrac
merriami	Baseline	1.03333	1.03333	Blue	MerSinGrac
merriami	Baseline	0	1	Blue	MerSinGrac
merriami	Baseline	0.508333	0	Blue	MerSinGrac
merriami	Baseline	0	0	Blue	MerSinGrac
merriami	Baseline	0	0	Blue	MerSinGrac
merriami	Baseline	0	0	Blue	MerSinGrac
merriami	Baseline	0	0	Blue	MerSinGrac
merriami	Baseline	0	0	Blue	MerSinGrac
merriami	Baseline	0	0	Blue	MerSinGrac
merriami	Baseline	0	1.34167	Blue	MerSinGrac
merriami	Baseline	1.31667	0	Blue	MerSinGrac
merriami	Baseline	0	0	Blue	MerSinGrac
merriami	Baseline	0.366667	0	Blue	MerSinGrac
merriami	Baseline	0	0	Blue	MerSinGrac
merriami	Baseline	0	0	Blue	MerSinGrac
merriami	Baseline	0.2	0.2	Blue	MerSinGrac
merriami	Baseline	0	0.975	Blue	MerSinGrac
merriami	Baseline	1.575	0.791667	Blue	MerSinGrac
merriami	Baseline	0	0	Blue	MerSinGrac
merriami	Baseline	0	0	Blue	MerSinGrac
merriami	Baseline	0	1.60833	Blue	MerSinGrac
merriami	Baseline	0	0.883333	Blue	MerSinGrac
merriami	Baseline	0	0.166667	Blue	MerSinGrac
merriami	Baseline	0	0	Blue	MerSinGrac
merriami	Baseline	1.64167	0.658333	Blue	MerSinGrac
merriami	Baseline	0.483333	0	Blue	MerSinGrac
merriami	Baseline	0	0.483333	Blue	MerSinGrac
merriami	Baseline	0.983333	0	Blue	MerSinGrac
merriami	Baseline	2.26667	1.50833	Blue	MerSinGrac
merriami	Baseline	0	2.44167	Blue	MerSinGrac
merriami	Baseline	0	2.14167	Blue	MerSinGrac
merriami	Baseline	0	2.30833	Blue	MerSinGrac
merriami	Baseline	0	0	Blue	MerSinGrac
merriami	Baseline	0	2.60833	Blue	MerSinGrac
merriami	Baseline	0	1	Blue	MerSinGrac
merriami	Baseline	0	1.34167	Blue	MerSinGrac
merriami	STI	0	0.616667	Blue	MerSinGrac
merriami	STI	0.475	0.241667	Blue	MerSinGrac
merriami	STI	0	0.675	Blue	MerSinGrac
merriami	STI	0	0.433333	Blue	MerSinGrac
merriami	STI	0	0	Blue	MerSinGrac
merriami	STI	0	0.858333	Blue	MerSinGrac
merriami	STI	0	0	Blue	MerSinGrac
merriami	STI	0	0	Blue	MerSinGrac
merriami	STI	0	1.775	Blue	MerSinGrac
merriami	STI	0.608333	1.225	Blue	MerSinGrac
merriami	STI	0	0.283333	Blue	MerSinGrac
merriami	STI	0	0.858333	Blue	MerSinGrac
merriami	STI	0	4.75833	Blue	MerSinGrac
merriami	STI	0	2.11667	Blue	MerSinGrac
merriami	STI	0	2.60833	Blue	MerSinGrac
merriami	STI	0	4.61667	Blue	MerSinGrac
merriami	STI	0	0.733333	Blue	MerSinGrac
merriami	STI	0	1.61667	Blue	MerSinGrac
merriami	STI	0	0	Blue	MerSinGrac
merriami	STI	0	2.39167	Blue	MerSinGrac
merriami	STI	0	1.64167	Blue	MerSinGrac
merriami	STI	0	1.43333	Blue	MerSinGrac
merriami	STI	0	2.55	Blue	MerSinGrac
merriami	STI	0	0.325	Blue	MerSinGrac
merriami	STI	0	1.01667	Blue	MerSinGrac
merriami	STI	0	1.8	Blue	MerSinGrac
merriami	STI	0	0	Blue	MerSinGrac
merriami	STI	0	1.55833	Blue	MerSinGrac
merriami	STI	0	1.24167	Blue	MerSinGrac
merriami	STI	0	2.49167	Blue	MerSinGrac
merriami	STI	0	2.10833	Blue	MerSinGrac
merriami	STI	0.4	0.791667	Blue	MerSinGrac
merriami	STI	0	0.725	Blue	MerSinGrac
parvus	Baseline	0	0.333333	Blue	ParCozVar
parvus	Baseline	0.333333	0.333333	Blue	ParCozVar
parvus	Baseline	0	0.325	Blue	ParCozVar
parvus	Baseline	0	0	Blue	ParCozVar
parvus	Baseline	0.758333	6.04167	Blue	ParCozVar
parvus	Baseline	1.125	5.06667	Blue	ParCozVar
parvus	Baseline	0.6	1.5	Blue	ParCozVar
parvus	Baseline	0	0	Blue	ParCozVar
parvus	Baseline	0	0	Blue	ParCozVar
parvus	Baseline	0	0	Blue	ParCozVar
parvus	Baseline	0.333333	0	Blue	ParCozVar
parvus	Baseline	0	0.658333	Blue	ParCozVar
parvus	Baseline	0	3.925	Blue	ParCozVar
parvus	Baseline	0	0	Blue	ParCozVar
parvus	Baseline	0	2.825	Blue	ParCozVar
parvus	Baseline	0.441667	4.38333	Blue	ParCozVar
parvus	Baseline	0	0	Blue	ParCozVar
parvus	Baseline	0	0	Blue	ParCozVar
parvus	Baseline	0	2.65833	Blue	ParCozVar
parvus	Baseline	0	5.14167	Blue	ParCozVar
parvus	STI	0	0	Blue	ParCozVar
parvus	STI	0.675	1.35	Blue	ParCozVar
parvus	STI	0	0.916667	Blue	ParCozVar
parvus	STI	0	2.225	Blue	ParCozVar
parvus	STI	0	0	Blue	ParCozVar
parvus	STI	0.416667	0	Blue	ParCozVar
parvus	STI	0	3.31667	Blue	ParCozVar
parvus	STI	0	0	Blue	ParCozVar
parvus	STI	0	1.89167	Blue	ParCozVar
parvus	STI	0	4.20833	Blue	ParCozVar
parvus	STI	0	4.50833	Blue	ParCozVar
parvus	STI	0	0.525	Blue	ParCozVar
parvus	STI	0	1.30833	Blue	ParCozVar
parvus	STI	0.95	0.475	Blue	ParCozVar
parvus	STI	0.308333	0	Blue	ParCozVar
parvus	STI	0	0.408333	Blue	ParCozVar
parvus	STI	0	3.25	Blue	ParCozVar
parvus	STI	0.458333	1.81667	Blue	ParCozVar
parvus	STI	0	1.61667	Blue	ParCozVar
parvus	STI	2.025	0	Blue	ParCozVar
parvus	STI	3.45	0	Blue	ParCozVar
parvus	STI	0	1.30833	Blue	ParCozVar
parvus	STI	0	0	Blue	ParCozVar
siniferus	Baseline	0	0.333333	White	MerSinGrac
siniferus	Baseline	0.6	1.8	White	MerSinGrac
siniferus	Baseline	0.666667	2.00833	White	MerSinGrac
siniferus	Baseline	0	3.275	White	MerSinGrac
siniferus	Baseline	0	0	White	MerSinGrac
siniferus	Baseline	0	0	White	MerSinGrac
siniferus	Baseline	0	0	White	MerSinGrac
siniferus	Baseline	0.775	1.15833	White	MerSinGrac
siniferus	Baseline	1.25	0.833333	White	MerSinGrac
siniferus	Baseline	0	0	White	MerSinGrac
siniferus	Baseline	0	1.46667	White	MerSinGrac
siniferus	Baseline	0	0	White	MerSinGrac
siniferus	Baseline	0	0	White	MerSinGrac
siniferus	Baseline	0	0.216667	White	MerSinGrac
siniferus	Baseline	0	0	White	MerSinGrac
siniferus	Baseline	0	0	White	MerSinGrac
siniferus	Baseline	0	0	White	MerSinGrac
siniferus	Baseline	0	0.833333	White	MerSinGrac
siniferus	Baseline	0.416667	1.25	White	MerSinGrac
siniferus	Baseline	0	0.741667	White	MerSinGrac
siniferus	Baseline	0	0	White	MerSinGrac
siniferus	Baseline	0.833333	0.833333	White	MerSinGrac
siniferus	Baseline	0	2.08333	White	MerSinGrac
siniferus	Baseline	0.416667	3.33333	White	MerSinGrac
siniferus	Baseline	1.66667	1.66667	White	MerSinGrac
siniferus	Baseline	0	2.8	White	MerSinGrac
siniferus	Baseline	3.625	2.41667	White	MerSinGrac
siniferus	Baseline	0	0	White	MerSinGrac
siniferus	Baseline	0	3.7	White	MerSinGrac
siniferus	Baseline	0	4.725	White	MerSinGrac
siniferus	Baseline	0	1.5	White	MerSinGrac
siniferus	Baseline	0	2.9	White	MerSinGrac
siniferus	Baseline	0	2.40833	White	MerSinGrac
siniferus	Baseline	0	0	White	MerSinGrac
siniferus	STI	0	1.65833	White	MerSinGrac
siniferus	STI	0	0	White	MerSinGrac
siniferus	STI	0	1.975	White	MerSinGrac
siniferus	STI	0	0	White	MerSinGrac
siniferus	STI	0	0	White	MerSinGrac
siniferus	STI	0	0.441667	White	MerSinGrac
siniferus	STI	0	1.18333	White	MerSinGrac
siniferus	STI	0	2.96667	White	MerSinGrac
siniferus	STI	0.441667	1.775	White	MerSinGrac
siniferus	STI	0	2.85833	White	MerSinGrac
siniferus	STI	1.36667	3.18333	White	MerSinGrac
siniferus	STI	0	0.908333	White	MerSinGrac
siniferus	STI	0	2.775	White	MerSinGrac
siniferus	STI	0	1.30833	White	MerSinGrac
siniferus	STI	0	0.816667	White	MerSinGrac
siniferus	STI	0	0.416667	White	MerSinGrac
siniferus	STI	0	0	White	MerSinGrac
siniferus	STI	1.76667	1.76667	White	MerSinGrac
siniferus	STI	0	5	White	MerSinGrac
siniferus	STI	0	0	White	MerSinGrac
siniferus	STI	0	0.891667	White	MerSinGrac
siniferus	STI	0	5.60833	White	MerSinGrac
siniferus	STI	0	0	White	MerSinGrac
siniferus	STI	0	0	White	MerSinGrac
siniferus	STI	0	0.408333	White	MerSinGrac
siniferus	STI	0	6	White	MerSinGrac
siniferus	STI	0.575	0.575	White	MerSinGrac
siniferus	STI	0	0	White	MerSinGrac
siniferus	STI	0	1.65	White	MerSinGrac
siniferus	STI	0	0	White	MerSinGrac
siniferus	STI	0	3.56667	White	MerSinGrac
siniferus	STI	0.875	0.875	White	MerSinGrac
siniferus	STI	0	2.08333	White	MerSinGrac
siniferus	STI	0	0	White	MerSinGrac
siniferus	STI	1.75	3.5	White	MerSinGrac
siniferus	STI	0	2.86667	White	MerSinGrac
siniferus	STI	0	0	White	MerSinGrac
siniferus	STI	0	2.69167	White	MerSinGrac
siniferus	STI	0	1.525	White	MerSinGrac
siniferus	STI	0	0	White	MerSinGrac
virgatus	Baseline	1.93333	1.93333	White	VirUndOcc
virgatus	Baseline	0	22.175	White	VirUndOcc
virgatus	Baseline	0	1.25	White	VirUndOcc
virgatus	Baseline	1.35	2.025	White	VirUndOcc
virgatus	Baseline	7.5	33.75	White	VirUndOcc
virgatus	Baseline	0	0	White	VirUndOcc
virgatus	Baseline	0	0	White	VirUndOcc
virgatus	Baseline	0	2	White	VirUndOcc
virgatus	Baseline	0	4.9	White	VirUndOcc
virgatus	Baseline	0	0	White	VirUndOcc
virgatus	Baseline	2.875	1.23333	White	VirUndOcc
virgatus	Baseline	2.66667	7.125	White	VirUndOcc
virgatus	Baseline	0.333333	0	White	VirUndOcc
virgatus	Baseline	0	0	White	VirUndOcc
virgatus	Baseline	0	0	White	VirUndOcc
virgatus	Baseline	0	0	White	VirUndOcc
virgatus	Baseline	0	0.375	White	VirUndOcc
virgatus	Baseline	34.7333	0	White	VirUndOcc
virgatus	Baseline	2.95	0.983333	White	VirUndOcc
virgatus	Baseline	0.366667	0.366667	White	VirUndOcc
virgatus	Baseline	1	1	White	VirUndOcc
virgatus	Baseline	0	0	White	VirUndOcc
virgatus	Baseline	0.891667	0	White	VirUndOcc
virgatus	Baseline	0	0.308333	White	VirUndOcc
virgatus	Baseline	6.36667	3.18333	White	VirUndOcc
virgatus	Baseline	0	0	White	VirUndOcc
virgatus	Baseline	0	1.06667	White	VirUndOcc
virgatus	Baseline	0.5	2.66667	White	VirUndOcc
virgatus	Baseline	0	2.60833	White	VirUndOcc
virgatus	Baseline	0	0	White	VirUndOcc
virgatus	STI	12.9667	27.775	White	VirUndOcc
virgatus	STI	0	3.1	White	VirUndOcc
virgatus	STI	0	3.40833	White	VirUndOcc
virgatus	STI	0	0.833333	White	VirUndOcc
virgatus	STI	0	0.35	White	VirUndOcc
virgatus	STI	0	6.04167	White	VirUndOcc
virgatus	STI	0	1	White	VirUndOcc
virgatus	STI	0	4.41667	White	VirUndOcc
virgatus	STI	0.808333	12.9417	White	VirUndOcc
virgatus	STI	0	5	White	VirUndOcc
virgatus	STI	0.491667	4.89167	White	VirUndOcc
virgatus	STI	0	0	White	VirUndOcc
virgatus	STI	0.558333	3.89167	White	VirUndOcc
virgatus	STI	1.15	0	White	VirUndOcc
virgatus	STI	0	0.516667	White	VirUndOcc
virgatus	STI	2.91667	5	White	VirUndOcc
virgatus	STI	0.45	1.35	White	VirUndOcc
virgatus	STI	0	11.25	White	VirUndOcc
virgatus	STI	13.9333	2.78333	White	VirUndOcc
virgatus	STI	0.366667	3.63333	White	VirUndOcc
variabilis	Baseline	0	0.4	Blue	ParCozVar
variabilis	Baseline	10.9917	10.175	Blue	ParCozVar
variabilis	Baseline	0.408333	0.808333	Blue	ParCozVar
variabilis	Baseline	0.45	0	Blue	ParCozVar
variabilis	Baseline	0.983333	0.983333	Blue	ParCozVar
variabilis	Baseline	0	0	Blue	ParCozVar
variabilis	Baseline	0	0	Blue	ParCozVar
variabilis	Baseline	0	3.25	Blue	ParCozVar
variabilis	Baseline	1.36667	10.9417	Blue	ParCozVar
variabilis	Baseline	0.5	0.5	Blue	ParCozVar
variabilis	Baseline	0	0	Blue	ParCozVar
variabilis	Baseline	4.525	3.16667	Blue	ParCozVar
variabilis	Baseline	1.95	2.925	Blue	ParCozVar
variabilis	Baseline	0	0	Blue	ParCozVar
variabilis	Baseline	0	5.88333	Blue	ParCozVar
variabilis	Baseline	0	0	Blue	ParCozVar
variabilis	Baseline	0	0	Blue	ParCozVar
variabilis	Baseline	0.491667	0.491667	Blue	ParCozVar
variabilis	STI	0	5.125	Blue	ParCozVar
variabilis	STI	1.44167	0	Blue	ParCozVar
variabilis	STI	0.408333	0.816667	Blue	ParCozVar
variabilis	STI	0	0	Blue	ParCozVar
variabilis	STI	0.866667	0.433333	Blue	ParCozVar
variabilis	STI	0	0	Blue	ParCozVar
variabilis	STI	0.966667	1.925	Blue	ParCozVar
variabilis	STI	0.833333	0	Blue	ParCozVar
variabilis	STI	0	0	Blue	ParCozVar
variabilis	STI	1.19167	3.575	Blue	ParCozVar
variabilis	STI	0	0	Blue	ParCozVar
variabilis	STI	0.966667	1.94167	Blue	ParCozVar
variabilis	STI	1.36667	2.28333	Blue	ParCozVar
variabilis	STI	0	0	Blue	ParCozVar
variabilis	STI	0	1.10833	Blue	ParCozVar
variabilis	STI	0	0	Blue	ParCozVar
variabilis	STI	0	1.00833	Blue	ParCozVar
variabilis	STI	0.591667	4.13333	Blue	ParCozVar
variabilis	STI	0.475	0.475	Blue	ParCozVar
variabilis	STI	0	0	Blue	ParCozVar
variabilis	STI	0	0	Blue	ParCozVar
variabilis	STI	1.375	2.29167	Blue	ParCozVar
variabilis	STI	0.575	0.575	Blue	ParCozVar
variabilis	STI	0	0.491667	Blue	ParCozVar
grammicus	Baseline	3.08667	0	Blue	GramJarrMeg
grammicus	Baseline	0	0.564167	Blue	GramJarrMeg
grammicus	Baseline	0	1.49	Blue	GramJarrMeg
grammicus	Baseline	14.2858	33.3333	Blue	GramJarrMeg
grammicus	Baseline	0	0	Blue	GramJarrMeg
grammicus	Baseline	4.72417	4.72417	Blue	GramJarrMeg
grammicus	Baseline	0	1.5	Blue	GramJarrMeg
grammicus	Baseline	1.24333	8.2875	Blue	GramJarrMeg
grammicus	Baseline	5.7975	13.0433	Blue	GramJarrMeg
grammicus	Baseline	0	2.96417	Blue	GramJarrMeg
grammicus	Baseline	0	2.20167	Blue	GramJarrMeg
grammicus	Baseline	0	4.28583	Blue	GramJarrMeg
grammicus	Baseline	0	1.5625	Blue	GramJarrMeg
grammicus	Baseline	0	0	Blue	GramJarrMeg
grammicus	Baseline	1.81833	0	Blue	GramJarrMeg
grammicus	Baseline	0	0	Blue	GramJarrMeg
grammicus	Baseline	0	0	Blue	GramJarrMeg
grammicus	Baseline	1.81583	3.17667	Blue	GramJarrMeg
grammicus	Baseline	0	0	Blue	GramJarrMeg
grammicus	Baseline	1.045	2.09083	Blue	GramJarrMeg
grammicus	Baseline	0	0	Blue	GramJarrMeg
grammicus	Baseline	0	3.84583	Blue	GramJarrMeg
grammicus	Baseline	0	0	Blue	GramJarrMeg
grammicus	Baseline	0	0	Blue	GramJarrMeg
grammicus	Baseline	0	0.386667	Blue	GramJarrMeg
grammicus	Baseline	0	0	Blue	GramJarrMeg
grammicus	Baseline	1.685	0	Blue	GramJarrMeg
grammicus	Baseline	0	1.36333	Blue	GramJarrMeg
grammicus	Baseline	0	0	Blue	GramJarrMeg
grammicus	Baseline	0	0	Blue	GramJarrMeg
grammicus	Baseline	1.59583	3.19167	Blue	GramJarrMeg
grammicus	Baseline	0	0	Blue	GramJarrMeg
grammicus	Baseline	1.8925	0.946667	Blue	GramJarrMeg
grammicus	STI	2.1275	19.1492	Blue	GramJarrMeg
grammicus	STI	0	1.29833	Blue	GramJarrMeg
grammicus	STI	0.5975	2.39083	Blue	GramJarrMeg
grammicus	STI	0	1.91667	Blue	GramJarrMeg
grammicus	STI	0	1.30417	Blue	GramJarrMeg
grammicus	STI	0	21.7392	Blue	GramJarrMeg
grammicus	STI	0	0	Blue	GramJarrMeg
grammicus	STI	0	0.9675	Blue	GramJarrMeg
grammicus	STI	0	0.899167	Blue	GramJarrMeg
grammicus	STI	0	4.94833	Blue	GramJarrMeg
grammicus	STI	0	1.18583	Blue	GramJarrMeg
grammicus	STI	0	1.695	Blue	GramJarrMeg
grammicus	STI	4.91833	39.3442	Blue	GramJarrMeg
grammicus	STI	1.4775	0.739167	Blue	GramJarrMeg
grammicus	STI	0	1.74917	Blue	GramJarrMeg
grammicus	STI	0	3.125	Blue	GramJarrMeg
grammicus	STI	0	3.16917	Blue	GramJarrMeg
grammicus	STI	0.714167	2.8575	Blue	GramJarrMeg
grammicus	STI	3.1575	2.105	Blue	GramJarrMeg
grammicus	STI	3.33333	6.66667	Blue	GramJarrMeg
grammicus	STI	0	0	Blue	GramJarrMeg
grammicus	STI	0	0.833333	Blue	GramJarrMeg
grammicus	STI	0	0	Blue	GramJarrMeg
grammicus	STI	0	5	Blue	GramJarrMeg
grammicus	STI	1.78	3.56083	Blue	GramJarrMeg
grammicus	STI	0	0.826667	Blue	GramJarrMeg
megalepidurus	Baseline	0.675	0.675	White	GramJarrMeg
megalepidurus	Baseline	0	0	White	GramJarrMeg
megalepidurus	Baseline	0	0	White	GramJarrMeg
megalepidurus	Baseline	1.15	2.3	White	GramJarrMeg
megalepidurus	Baseline	0	0	White	GramJarrMeg
megalepidurus	Baseline	0.308333	0.616667	White	GramJarrMeg
megalepidurus	Baseline	0.716667	2.14167	White	GramJarrMeg
megalepidurus	Baseline	0	1.56667	White	GramJarrMeg
megalepidurus	Baseline	0	0	White	GramJarrMeg
megalepidurus	Baseline	2.725	8.18333	White	GramJarrMeg
megalepidurus	Baseline	0	0	White	GramJarrMeg
megalepidurus	Baseline	0	2.34167	White	GramJarrMeg
megalepidurus	Baseline	0.666667	1	White	GramJarrMeg
megalepidurus	Baseline	4.66667	3.10833	White	GramJarrMeg
megalepidurus	Baseline	0.3	3.00833	White	GramJarrMeg
megalepidurus	Baseline	0	1.9	White	GramJarrMeg
megalepidurus	Baseline	0	3.45	White	GramJarrMeg
megalepidurus	Baseline	1.225	1.225	White	GramJarrMeg
megalepidurus	Baseline	0	0	White	GramJarrMeg
megalepidurus	Baseline	0.5	3.975	White	GramJarrMeg
megalepidurus	Baseline	0.475	0.95	White	GramJarrMeg
megalepidurus	Baseline	2.45	2.45	White	GramJarrMeg
megalepidurus	Baseline	0.5	1	White	GramJarrMeg
megalepidurus	Baseline	0.325	1.96667	White	GramJarrMeg
megalepidurus	Baseline	0	4	White	GramJarrMeg
megalepidurus	Baseline	1.55833	2.34167	White	GramJarrMeg
megalepidurus	Baseline	0	2.58333	White	GramJarrMeg
megalepidurus	Baseline	2.5	5	White	GramJarrMeg
megalepidurus	STI	0	0.533333	White	GramJarrMeg
megalepidurus	Baseline	0	0	White	GramJarrMeg
megalepidurus	Baseline	0	2.675	White	GramJarrMeg
megalepidurus	STI	0.316667	5.65833	White	GramJarrMeg
megalepidurus	Baseline	0.4	4.04167	White	GramJarrMeg
megalepidurus	Baseline	0	0	White	GramJarrMeg
megalepidurus	Baseline	1.15	2.30833	White	GramJarrMeg
megalepidurus	Baseline	0.5	3.50833	White	GramJarrMeg
megalepidurus	Baseline	0.666667	0.666667	White	GramJarrMeg
megalepidurus	Baseline	0	0.825	White	GramJarrMeg
megalepidurus	STI	0	2.04167	White	GramJarrMeg
megalepidurus	STI	0	3.925	White	GramJarrMeg
megalepidurus	STI	0.483333	1.93333	White	GramJarrMeg
megalepidurus	STI	2.99167	4.98333	White	GramJarrMeg
megalepidurus	STI	0	2	White	GramJarrMeg
megalepidurus	STI	0	4	White	GramJarrMeg
megalepidurus	STI	0	0	White	GramJarrMeg
megalepidurus	STI	0	3.9	White	GramJarrMeg
megalepidurus	STI	0	5.95	White	GramJarrMeg
megalepidurus	STI	0.416667	3.325	White	GramJarrMeg
megalepidurus	STI	0	1.20833	White	GramJarrMeg
megalepidurus	STI	1.19167	4.76667	White	GramJarrMeg
megalepidurus	STI	0.65	1.3	White	GramJarrMeg
megalepidurus	STI	0	3.44167	White	GramJarrMeg
megalepidurus	STI	0	1.21667	White	GramJarrMeg
megalepidurus	STI	0	1.05833	White	GramJarrMeg
megalepidurus	STI	0.841667	3.775	White	GramJarrMeg
megalepidurus	STI	1.01667	4.05	White	GramJarrMeg
megalepidurus	STI	1.48333	3.45	White	GramJarrMeg
megalepidurus	STI	1.08333	4.89167	White	GramJarrMeg
megalepidurus	STI	0	2.23333	White	GramJarrMeg
megalepidurus	STI	0	3.08333	White	GramJarrMeg
megalepidurus	STI	0.441667	1.78333	White	GramJarrMeg
jarrovii	Baseline	0.483333	0.483333	Blue	GramJarrMeg
jarrovii	Baseline	0.75	7.54167	Blue	GramJarrMeg
jarrovii	Baseline	0	2.275	Blue	GramJarrMeg
jarrovii	Baseline	0	2.94167	Blue	GramJarrMeg
jarrovii	Baseline	4.025	5.36667	Blue	GramJarrMeg
jarrovii	Baseline	0	7.525	Blue	GramJarrMeg
jarrovii	Baseline	0	3.425	Blue	GramJarrMeg
jarrovii	Baseline	0.35	2.11667	Blue	GramJarrMeg
jarrovii	Baseline	1.10833	6.66667	Blue	GramJarrMeg
jarrovii	Baseline	0	1.325	Blue	GramJarrMeg
jarrovii	Baseline	0	0	Blue	GramJarrMeg
jarrovii	Baseline	0	0	Blue	GramJarrMeg
jarrovii	Baseline	0.75	3.38333	Blue	GramJarrMeg
jarrovii	Baseline	0.4	3.575	Blue	GramJarrMeg
jarrovii	Baseline	3.61667	0.808333	Blue	GramJarrMeg
jarrovii	Baseline	1.96667	3.43333	Blue	GramJarrMeg
jarrovii	Baseline	0.991667	7.90833	Blue	GramJarrMeg
jarrovii	Baseline	3.2	11.7417	Blue	GramJarrMeg
jarrovii	Baseline	0	0	Blue	GramJarrMeg
jarrovii	Baseline	6.24167	8.325	Blue	GramJarrMeg
jarrovii	Baseline	1.79167	4.475	Blue	GramJarrMeg
jarrovii	Baseline	0	2.49167	Blue	GramJarrMeg
jarrovii	Baseline	0	1.38333	Blue	GramJarrMeg
jarrovii	Baseline	1.91667	2.4	Blue	GramJarrMeg
jarrovii	Baseline	0.491667	4.45	Blue	GramJarrMeg
jarrovii	Baseline	0	1.48333	Blue	GramJarrMeg
jarrovii	Baseline	0.5	2.975	Blue	GramJarrMeg
jarrovii	Baseline	0	4.36667	Blue	GramJarrMeg
jarrovii	Baseline	0.908333	1.81667	Blue	GramJarrMeg
jarrovii	Baseline	5.025	13.4083	Blue	GramJarrMeg
jarrovii	Baseline	0	0	Blue	GramJarrMeg
jarrovii	Baseline	2.69167	8.075	Blue	GramJarrMeg
jarrovii	STI	2.39167	13.775	Blue	GramJarrMeg
jarrovii	STI	3	17.25	Blue	GramJarrMeg
jarrovii	STI	0.683333	3.43333	Blue	GramJarrMeg
jarrovii	STI	1.175	16.4083	Blue	GramJarrMeg
jarrovii	STI	0	7.03333	Blue	GramJarrMeg
jarrovii	STI	3.95	9.58333	Blue	GramJarrMeg
jarrovii	STI	0	8.25	Blue	GramJarrMeg
jarrovii	STI	0	2.15833	Blue	GramJarrMeg
jarrovii	STI	4.1	8.2	Blue	GramJarrMeg
jarrovii	STI	3.63333	5.90833	Blue	GramJarrMeg
jarrovii	STI	0	7.05	Blue	GramJarrMeg
jarrovii	STI	0	4.35	Blue	GramJarrMeg
jarrovii	STI	1.50833	9.06667	Blue	GramJarrMeg
jarrovii	STI	0.858333	7.73333	Blue	GramJarrMeg
jarrovii	STI	0	11.9417	Blue	GramJarrMeg
jarrovii	STI	0	5.43333	Blue	GramJarrMeg
jarrovii	STI	0	4	Blue	GramJarrMeg
jarrovii	STI	0.7	7.65833	Blue	GramJarrMeg
jarrovii	STI	4.65833	9.30833	Blue	GramJarrMeg
jarrovii	STI	3.41667	6.4	Blue	GramJarrMeg
jarrovii	STI	2.74167	15.0667	Blue	GramJarrMeg
jarrovii	STI	1.29167	6.20833	Blue	GramJarrMeg
jarrovii	STI	6	9	Blue	GramJarrMeg
jarrovii	STI	0.65	5.20833	Blue	GramJarrMeg
jarrovii	STI	0.658333	6.575	Blue	GramJarrMeg
jarrovii	STI	2.25	11.25	Blue	GramJarrMeg
jarrovii	STI	0.95	10.4083	Blue	GramJarrMeg
jarrovii	STI	4.75833	12.7	Blue	GramJarrMeg
jarrovii	STI	0.483333	1.44167	Blue	GramJarrMeg
jarrovii	STI	0	0.833333	Blue	GramJarrMeg
jarrovii	STI	0	7.74167	Blue	GramJarrMeg
graciosus	Baseline	0	0	Blue	MerSinGrac
graciosus	Baseline	0	0.808333	Blue	MerSinGrac
graciosus	Baseline	0	0	Blue	MerSinGrac
graciosus	Baseline	0.941667	1.40833	Blue	MerSinGrac
graciosus	Baseline	0	1.5	Blue	MerSinGrac
graciosus	Baseline	0	1.29167	Blue	MerSinGrac
graciosus	Baseline	0	0.5	Blue	MerSinGrac
graciosus	Baseline	0	0.975	Blue	MerSinGrac
graciosus	Baseline	0	0	Blue	MerSinGrac
graciosus	Baseline	0	0	Blue	MerSinGrac
graciosus	Baseline	0	3.175	Blue	MerSinGrac
graciosus	Baseline	0	1.69167	Blue	MerSinGrac
graciosus	Baseline	0.491667	0	Blue	MerSinGrac
graciosus	Baseline	0.958333	0.958333	Blue	MerSinGrac
graciosus	Baseline	0	0	Blue	MerSinGrac
graciosus	Baseline	0	3.675	Blue	MerSinGrac
graciosus	Baseline	0	0.666667	Blue	MerSinGrac
graciosus	Baseline	1.21667	2.83333	Blue	MerSinGrac
graciosus	Baseline	0	0	Blue	MerSinGrac
graciosus	Baseline	0	3.3	Blue	MerSinGrac
graciosus	Baseline	0	7.75833	Blue	MerSinGrac
graciosus	Baseline	0.366667	1.85	Blue	MerSinGrac
graciosus	Baseline	0.983333	0.983333	Blue	MerSinGrac
graciosus	Baseline	0	0.458333	Blue	MerSinGrac
graciosus	Baseline	0	0	Blue	MerSinGrac
graciosus	Baseline	0	1.00833	Blue	MerSinGrac
graciosus	Baseline	0.491667	2.94167	Blue	MerSinGrac
graciosus	STI	0.733333	4.4	Blue	MerSinGrac
graciosus	STI	1.475	1.475	Blue	MerSinGrac
graciosus	STI	0	0.541667	Blue	MerSinGrac
graciosus	STI	2.41667	3.625	Blue	MerSinGrac
graciosus	STI	1.25	2.5	Blue	MerSinGrac
graciosus	STI	1.43333	4.30833	Blue	MerSinGrac
graciosus	STI	4.125	0.591667	Blue	MerSinGrac
graciosus	STI	0.875	1.30833	Blue	MerSinGrac
graciosus	STI	0.491667	2.45833	Blue	MerSinGrac
graciosus	STI	0.45	1.81667	Blue	MerSinGrac
graciosus	STI	0	0	Blue	MerSinGrac
graciosus	STI	0	2.25833	Blue	MerSinGrac
graciosus	STI	2.525	2.525	Blue	MerSinGrac
graciosus	STI	0	0.283333	Blue	MerSinGrac
graciosus	STI	4.14167	7.24167	Blue	MerSinGrac
graciosus	STI	0	4.54167	Blue	MerSinGrac
graciosus	STI	0	7.28333	Blue	MerSinGrac
graciosus	STI	0	0	Blue	MerSinGrac
graciosus	STI	0	2.375	Blue	MerSinGrac
graciosus	STI	3.55833	19.1917	Blue	MerSinGrac
graciosus	STI	0.408333	1.61667	Blue	MerSinGrac
graciosus	STI	0.425	5.55	Blue	MerSinGrac
graciosus	STI	0	5.98333	Blue	MerSinGrac
graciosus	STI	1.15833	3.48333	Blue	MerSinGrac
graciosus	STI	0	2.55	Blue	MerSinGrac
graciosus	STI	0	7.73333	Blue	MerSinGrac
graciosus	STI	0.541667	1.63333	Blue	MerSinGrac
occidentalis	Baseline	2.54167	1.98333	Blue	VirUndOcc
occidentalis	Baseline	0.5	1	Blue	VirUndOcc
occidentalis	Baseline	0	0.466667	Blue	VirUndOcc
occidentalis	Baseline	0	1.025	Blue	VirUndOcc
occidentalis	Baseline	0.416667	2.49167	Blue	VirUndOcc
occidentalis	Baseline	0.416667	0.825	Blue	VirUndOcc
occidentalis	Baseline	0	0.491667	Blue	VirUndOcc
occidentalis	Baseline	0	0.45	Blue	VirUndOcc
occidentalis	Baseline	0	0.458333	Blue	VirUndOcc
occidentalis	Baseline	0	0.616667	Blue	VirUndOcc
occidentalis	Baseline	0	1.05	Blue	VirUndOcc
occidentalis	Baseline	0.491667	1.48333	Blue	VirUndOcc
occidentalis	Baseline	0	0.983333	Blue	VirUndOcc
occidentalis	Baseline	0	3.98333	Blue	VirUndOcc
occidentalis	Baseline	0.941667	0.941667	Blue	VirUndOcc
occidentalis	Baseline	0.491667	1.475	Blue	VirUndOcc
occidentalis	Baseline	1	5.98333	Blue	VirUndOcc
occidentalis	Baseline	0.958333	4.325	Blue	VirUndOcc
occidentalis	Baseline	0	1.475	Blue	VirUndOcc
occidentalis	Baseline	0	0	Blue	VirUndOcc
occidentalis	Baseline	0	0	Blue	VirUndOcc
occidentalis	Baseline	0	0	Blue	VirUndOcc
occidentalis	Baseline	0.483333	1.45	Blue	VirUndOcc
occidentalis	Baseline	0	0	Blue	VirUndOcc
occidentalis	Baseline	0	1.60833	Blue	VirUndOcc
occidentalis	Baseline	0	2.98333	Blue	VirUndOcc
occidentalis	Baseline	0.491667	0.491667	Blue	VirUndOcc
occidentalis	Baseline	0	0.958333	Blue	VirUndOcc
occidentalis	Baseline	0.808333	1.20833	Blue	VirUndOcc
occidentalis	Baseline	0.991667	3.475	Blue	VirUndOcc
occidentalis	Baseline	0	0	Blue	VirUndOcc
occidentalis	Baseline	0	0	Blue	VirUndOcc
occidentalis	Baseline	0.475	0	Blue	VirUndOcc
occidentalis	Baseline	0	0	Blue	VirUndOcc
occidentalis	Baseline	2.275	4.54167	Blue	VirUndOcc
occidentalis	Baseline	0	0.625	Blue	VirUndOcc
occidentalis	Baseline	0	1.525	Blue	VirUndOcc
occidentalis	Baseline	0.575	1.15833	Blue	VirUndOcc
occidentalis	Baseline	0	0.625	Blue	VirUndOcc
occidentalis	Baseline	0.558333	7.225	Blue	VirUndOcc
occidentalis	Baseline	0	1.375	Blue	VirUndOcc
occidentalis	Baseline	0	1.38333	Blue	VirUndOcc
occidentalis	Baseline	0	0	Blue	VirUndOcc
occidentalis	Baseline	0	0	Blue	VirUndOcc
occidentalis	Baseline	0	0.808333	Blue	VirUndOcc
occidentalis	STI	0	1.625	Blue	VirUndOcc
occidentalis	STI	0	1.775	Blue	VirUndOcc
occidentalis	STI	0.358333	1.8	Blue	VirUndOcc
occidentalis	STI	0.908333	1.80833	Blue	VirUndOcc
occidentalis	STI	0	0	Blue	VirUndOcc
occidentalis	STI	0	0	Blue	VirUndOcc
occidentalis	STI	0	0	Blue	VirUndOcc
occidentalis	STI	0	0	Blue	VirUndOcc
occidentalis	STI	0	1.88333	Blue	VirUndOcc
occidentalis	STI	4.69167	2.675	Blue	VirUndOcc
occidentalis	STI	2.58333	1.93333	Blue	VirUndOcc
occidentalis	STI	1.88333	3.76667	Blue	VirUndOcc
occidentalis	STI	0.641667	5.125	Blue	VirUndOcc
occidentalis	STI	0	1.88333	Blue	VirUndOcc
occidentalis	STI	0	3.80833	Blue	VirUndOcc
occidentalis	STI	0	1.29167	Blue	VirUndOcc
occidentalis	STI	0.5	0.5	Blue	VirUndOcc
occidentalis	STI	1.7	3.96667	Blue	VirUndOcc
occidentalis	STI	0.533333	1.06667	Blue	VirUndOcc
occidentalis	STI	6.125	1.35833	Blue	VirUndOcc
